# Supplementary material for: Efficient and chromaticity stable green and white organic light-emitting devices with organic–inorganic hybrid materials
Source: Royal Society of Chemistry journal article supplement (doi:10.1039/d0ra02122a), 2020-01-01

**Table S1:** Summary of device performances I-V with other recently reported green emitting devices

| <b>EIL</b>                        | <b>V (V)</b> | <b>L (cd/m<sup>2</sup>)</b> | <b><math>\eta_c</math> (cd A<sup>-1</sup>)</b> | <b><math>\eta_p</math> (lm W<sup>-1</sup>)</b> | <b>Reference</b> |
|-----------------------------------|--------------|-----------------------------|------------------------------------------------|------------------------------------------------|------------------|
| ZnO /F8BT                         | 6.0          | 8600                        | 1.5                                            | -                                              | 79               |
| TiO <sub>2</sub> /F8BT            | 10.6         | 805                         | 0.03                                           | -                                              | 80               |
| ZrO <sub>2</sub> /red F           | 11.8         | 3450                        | 0.47                                           | 0.18                                           | 80               |
| ZrO <sub>2</sub> /L-green         | 11.8         | 4560                        | 1.01                                           | 0.41                                           | 80               |
| ZrO <sub>2</sub> /L-Blue          | 13.2         | 470                         | 0.12                                           | 0.03                                           | 80               |
| ZrO <sub>2</sub> / F8BT           | 9.0          | 25970                       | 2.71                                           | 1.02                                           | 80               |
| ZrO <sub>2</sub> /PFO             | 9.2          | 309                         | 0.03                                           | 0.015                                          | 80               |
| PE/Ag                             | 0.80         | 1689                        | -                                              | -                                              | 80               |
| TiO <sub>2</sub> /F8BT            | 10.6         | 805                         | 0.03                                           | 0.01                                           | 80               |
| TiO <sub>2</sub> /red F           | 12.4         | 168                         | 0.01                                           | 0.003                                          | 80               |
| TiO <sub>2</sub> /L-green         | 10.8         | 2.9                         | 0.0002                                         | 0.00007                                        | 80               |
| TiO <sub>2</sub> /L-Blue          | 14.8         | 5.1                         | 0.0007                                         | 0.0002                                         | 80               |
| TiO <sub>2</sub> / F8BT           | 10.6         | 805                         | 0.03                                           | 0.01                                           | 80               |
| TiO <sub>2</sub> /PFO             | 12.8         | 0.1                         | 0.000005                                       | 0.000001                                       | 80               |
| PE/Al                             | 0.82         | 1964                        | -                                              | -                                              | 81               |
| Ti-ZrO <sub>2</sub> (2%)          | 7.2          | 24948                       | 2.84                                           | 1.32                                           | 82               |
| <b>(2.0 % SnO<sub>2</sub>)</b>    | 15.1         | 28182                       | 52.3                                           | 10.9                                           | <b>This work</b> |
| <b>(2.0 % Cd-SnO<sub>2</sub>)</b> | 13.3         | 30858                       | 60.6                                           | 15.4                                           | <b>This work</b> |

**Figure S1:** FT-IR spectra of SnO<sub>2</sub> and Cd-doped SnO<sub>2</sub>

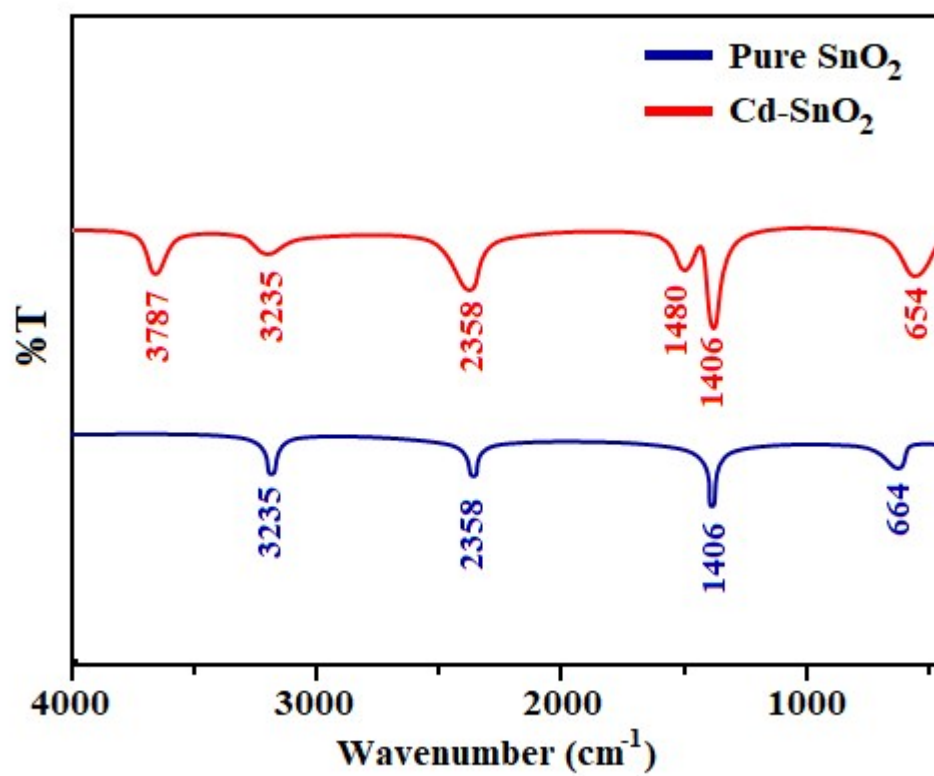

Supplement: d0ra02122a1.pdf [file d0ra02122a1.pdf]
